# Supplementary material for: Widespread theta synchrony and high-frequency desynchronization underlies enhanced cognition
Source: PubMed Central journal article supplement (PMC5700170; doi:10.1038/s41467-017-01763-2), 2017-11-22
Supplement: 41467_2017_1763_MOESM1_ESM.pdf [file 41467_2017_1763_MOESM1_ESM.pdf]

## Supplementary Figures

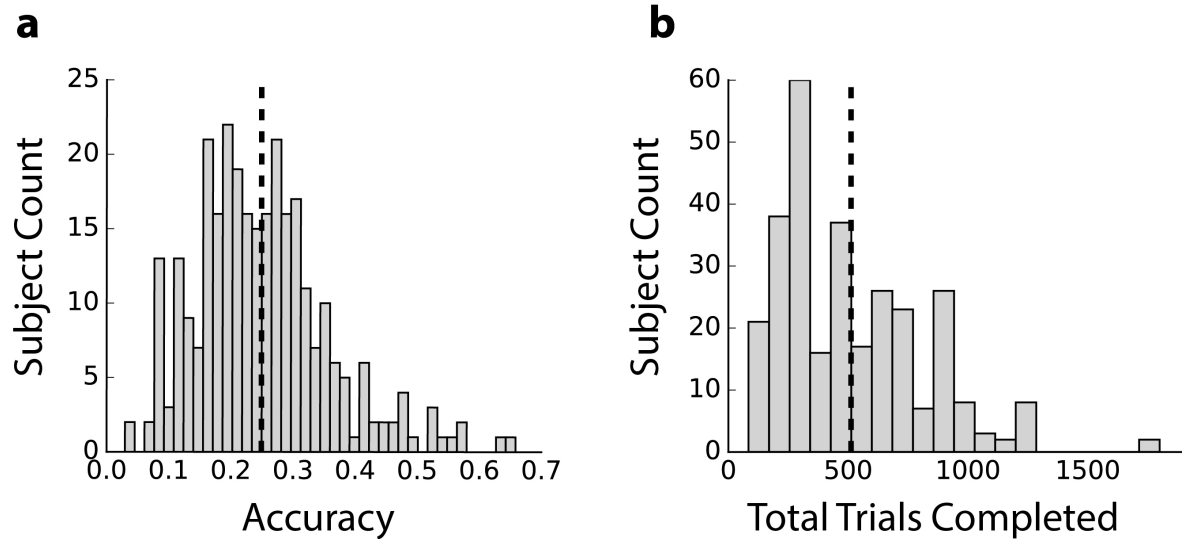

**Supplementary Figure 1. Free-recall behavioral results.** (a) Distribution of subject accuracy on the verbal delayed free-recall task, mean indicated by vertical line (n=294). (b) Distribution of number of total trials (i.e. word presentations) completed by each subject.

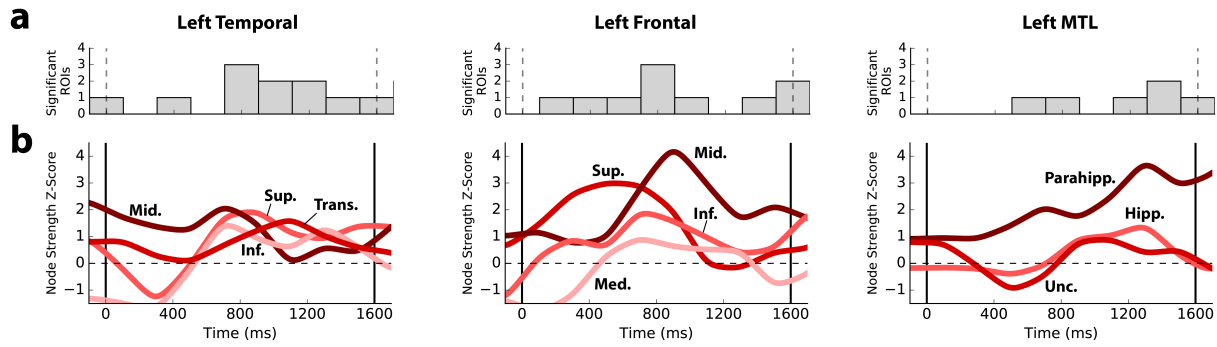

**Supplementary Figure 2. Left-hemispheric theta (3-8 Hz) hub timecourses.** (Figures organized according to caption of Figure 3 in the main text.) **(a)** Count of significant ( $P < 0.05$ ) node strength for ROIs within three broad regions: left temporal, frontal, and medial temporal lobes. **(b)** Smoothed timecourses of node strength for each ROI.

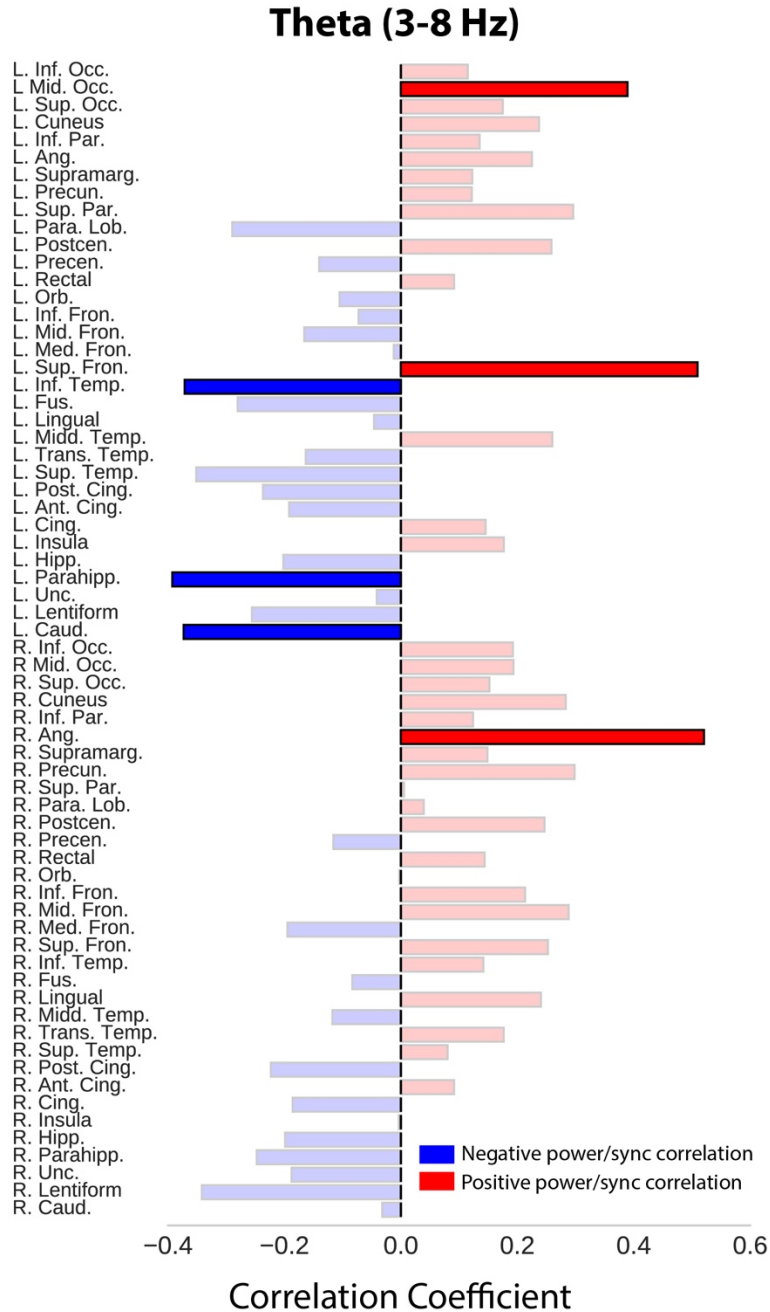

**Supplementary Figure 3. Power-synchrony correlation in the theta band.** Correlation of the modulation of theta (3-8 Hz) node strength and power across time and frequency for each ROI, during the word encoding interval (0-1600ms). Bar plots show the power-synchrony correlation for each ROI, with blue indicating negative and red indicating positive correlations. Faded bars are not significant after FDR correction for multiple comparisons ( $\alpha = 0.05$ ).

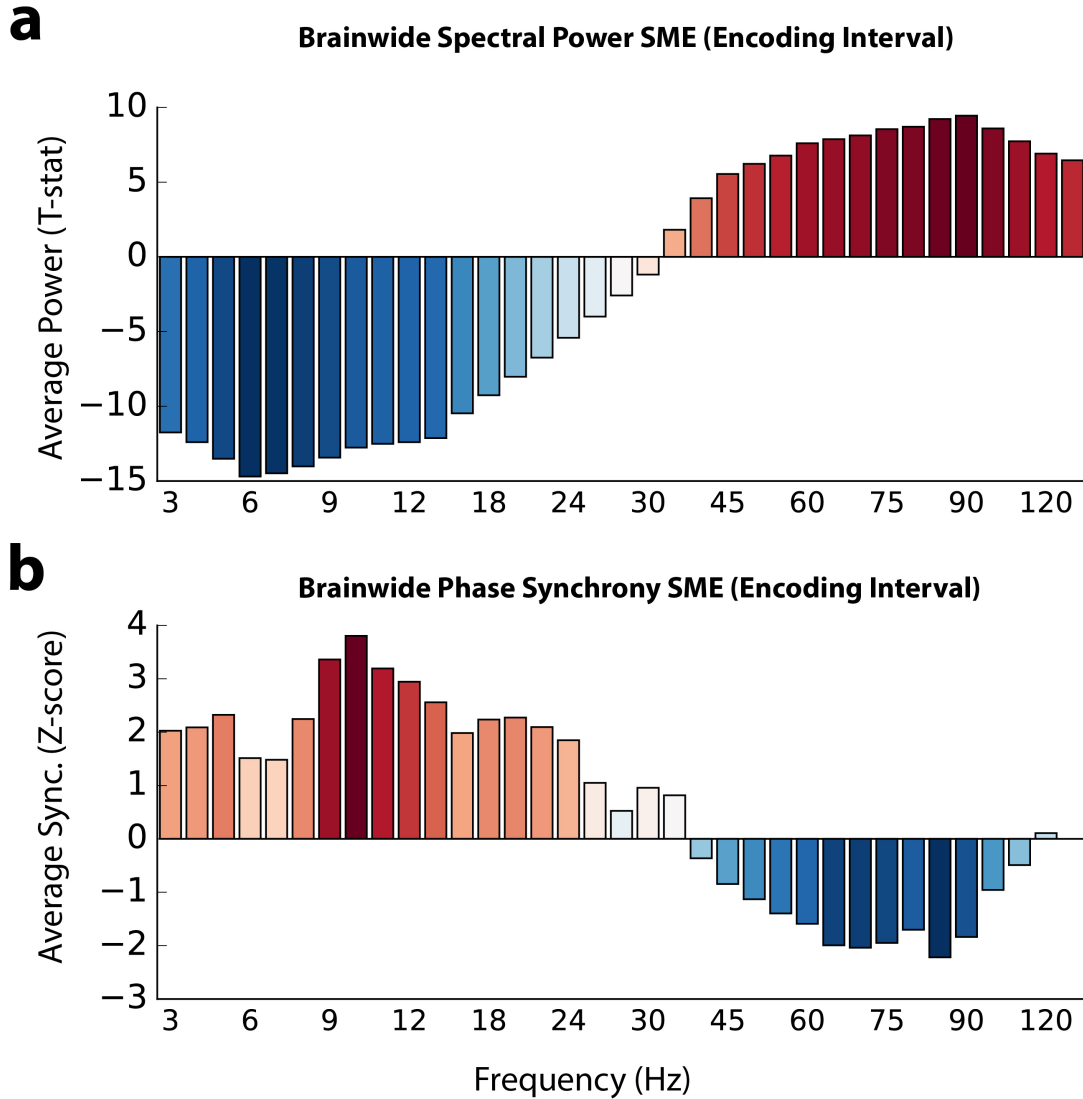

**Supplementary Figure 4. Memory-associated brainwide spectral power and phase synchrony in the encoding interval (0-1600 ms).** (a) Average brainwide t-statistic reflecting the relative change in spectral power across all electrodes and all subjects in remembered vs. not-remembered conditions (see Fig. S2 and methods for details). (b) Average brainwide z-score reflecting the relative change in phase synchrony across all electrode pairs and all subjects in remembered vs. not-remembered conditions.

## Supplementary Tables

| Region Name                                                                    | Abbreviation  | Z-score |
|--------------------------------------------------------------------------------|---------------|---------|
| <b>Core Memory Network (in-network), corrected <math>P &lt; 0.01</math></b>    |               |         |
| R. Extra-Nuclear                                                               | R. Extra-Nuc  | N/A     |
| R. Parahippocampal Gyrus                                                       | R. Parahipp.  | 4.11    |
| R. Subgyral                                                                    | R. Subgyral   | N/A     |
| R. Lingual Gyrus                                                               | R. Lingual    | 6.71    |
| R. Fusiform Gyrus                                                              | R. Fus.       | 6.77    |
| R. Middle Frontal Gyrus                                                        | R. Mid. Fron. | 4.86    |
| R. Inferior Frontal Gyrus                                                      | R. Inf. Fron. | 5.66    |
| R. Precentral Gyrus                                                            | R. Precen.    | 5.32    |
| R. Superior Parietal Lobule                                                    | R. Sup. Par.  | 3.65    |
| R. Cuneus                                                                      | R. Cuneus     | 6.15    |
| R. Superior Occipital Gyrus                                                    | R. Sup. Occ.  | 4.25    |
| R. Middle Occipital Gyrus                                                      | R. Mid. Occ.  | 11.86   |
| R. Inferior Occipital Gyrus                                                    | R. Inf. Occ.  | 11.05   |
| L. Extra-Nuclear                                                               | L. Extra-Nuc. | N/A     |
| L. Uncus                                                                       | L. Unc.       | 5.07    |
| L. Parahippocampal Gyrus                                                       | L. Parahipp.  | 8.53    |
| L. Hippocampus                                                                 | L. Hipp.      | 5.30    |
| L. Cingulate                                                                   | L. Cing.      | 4.99    |
| L. Subgyral                                                                    | L. Subgyral   | N/A     |
| L. Superior Temporal Gyrus                                                     | L. Sup. Temp. | 3.97    |
| L. Middle Temporal Gyrus                                                       | L. Mid. Temp. | 9.18    |
| L. Lingual Gyrus                                                               | L. Lingual    | 5.46    |
| L. Fusiform Gyrus                                                              | L. Fus.       | 12.21   |
| L. Inferior Temporal Gyrus                                                     | L. Inf. Temp. | 9.21    |
| L. Superior Temporal Gyrus                                                     | L. Sup. Temp. | 7.75    |
| L. Medial Frontal Gyrus                                                        | L. Med. Fron. | 4.40    |
| L. Middle Frontal Gyrus                                                        | L. Mid. Fron. | 14.31   |
| L. Inferior Frontal Gyrus                                                      | L. Inf. Fron. | 14.12   |
| L. Orbital Gyrus                                                               | L. Orb.       | 5.04    |
| L. Precentral Gyrus                                                            | L. Precen.    | 4.72    |
| L. Postcentral Gyrus                                                           | L. Postcen.   | 6.13    |
| L. Superior Parietal Lobule                                                    | L. Sup. Par.  | 6.02    |
| L. Supramarginal Gyrus                                                         | L. Supramarg. | 5.48    |
| L. Inferior Parietal Lobule                                                    | L. Inf. Par.  | 7.69    |
| L. Cuneus                                                                      | L. Cuneus     | 6.77    |
| L. Middle Occipital Gyrus                                                      | L. Mid. Occ.  | 12.20   |
| L. Inferior Occipital Gyrus                                                    | L. Inf. Occ.  | 5.67    |
| <b>Non-Memory Network (out-of-network), corrected <math>P &gt; 0.01</math></b> |               |         |
| R. Thalamus                                                                    | R. Thal.      | 2.29    |
| R. Caudate                                                                     | R. Caud.      | 1.81    |
| R. Lentiform Nucleus                                                           | R. Lentiform  | 0.46    |

|                              |                 |       |
|------------------------------|-----------------|-------|
| R. Uncus                     | R. Unc.         | -0.37 |
| R. Subcallosal Gyrus         | R. Subcall.     | 0.49  |
| R. Hippocampus               | R. Hipp.        | 1.01  |
| R. Insula                    | R. Insula       | -0.29 |
| R. Cingulate                 | R. Cing.        | 1.65  |
| R. Anterior Cingulate        | R. Ant. Cing.   | 0.12  |
| R. Posterior Cingulate       | R. Post. Cing.  | 0.13  |
| R. Superior Temporal Gyrus   | R. Sup. Temp.   | -2.26 |
| R. Transverse Temporal Gyrus | R. Trans. Temp. | -0.09 |
| R. Middle Temporal Gyrus     | R. Mid. Temp.   | 1.78  |
| R. Inferior Temporal Gyrus   | R. Inf. Temp.   | 0.80  |
| R. Superior Frontal Gyrus    | R. Sup. Fron.   | 0.80  |
| R. Medial Frontal Gyrus      | R. Med. Fron.   | -1.39 |
| R. Orbital Gyrus             | R. Orb.         | 0.93  |
| R. Rectal Gyrus              | R. Rectal       | 0.94  |
| R. Postcentral Gyrus         | R. Postcen.     | 1.67  |
| R. Paracentral Lobule        | R. Para. Lob.   | -0.46 |
| R. Precuneus                 | R. Precun.      | 0.86  |
| R. Supramarginal Gyrus       | R. Supramarg.   | -2.30 |
| R. Angular Gyrus             | R. Ang.         | -1.52 |
| R. Inferior Parietal Lobule  | R. Inf. Par.    | -0.69 |
| L. Thalamus                  | L. Thal.        | 1.64  |
| L. Caudate                   | L. Caud.        | 1.35  |
| L. Lentiform Nucleus         | L. Lentiform    | -0.19 |
| L. Subcallosal Gyrus         | L. Subcall.     | 0.96  |
| L. Insula                    | L. Insula       | 1.78  |
| L. Anterior Cingulate        | L. Ant. Cing.   | -1.29 |
| L. Posterior Cingulate       | L. Post. Cing.  | 2.50  |
| L. Transverse Temporal Gyrus | L. Trans. Temp. | 2.23  |
| L. Rectal Gyrus              | L. Rectal       | 2.01  |
| L. Paracentral Lobule        | L. Para. Lob.   | -1.07 |
| L. Precuneus                 | L. Precun.      | 0.17  |
| L. Angular Gyrus             | L. Ang.         | -1.15 |
| L. Superior Occipital Gyrus  | L. Sup. Occ.    | 2.07  |

**Supplementary Table 1. List of ROIs included in the core memory network.** List of the 74 ROIs (37 per hemisphere) used in this study, with abbreviations. Z-scores reflect a comparison of the spectral power between remembered and not-remembered trials, averaged across subjects and electrodes. ROIs in the core memory network had significant power differences between the two conditions ( $P < 0.01$ , Benjamini-Hochberg corrected for multiple comparisons; see Methods for details). Four subcortical ROIs indicated with N/A were excluded from this analysis due to limited data (less than 5 subjects with electrodes placed in the ROI).
